# Supplementary material
Source: Research Square preprint supplement (doi:10.21203/rs.3.rs-9139546/v1)
Supplement: Supplementary file 1 [file 83d463973d09d93e5eec89c5.docx]

**Hydrothermal Transformation of Mixed Plastic–Lignocellulosic Waste: Polymer Degradation Pathways and Environmental Implications**

Ran darzi a, Sandra Khuri b, Yael Dubowski a, Lilach Iasur Kruh b, Roy Posmanik a,c*

a Faculty of Civil and Environmental Engineering, Technion, Israel Institute of Technology, Haifa, 32000, Israel

b Department of Biotechnology Engineering, Braude College of Engineering, Karmiel, Israel

c Institute of Soil, Water and Environmental Science, Volcani Institute, Newe Ya'ar Research Center, 30095, Israel

**Supplementary Information**

Fig. S1 depicts a digital-microscope images of the co-processed LDPE and wheat straw feedstocks, and of the resulting products after 200°C hydrothermal treatment. At 200°C both feedstocks showed negligible reactivity. The LDPE granules and the straw retained similarity to their original shape (Fig. S1). Key analytical examinations show only a minor change after 200°C treatment; therefore, it was excluded from more complex and resource-intensive measurements.


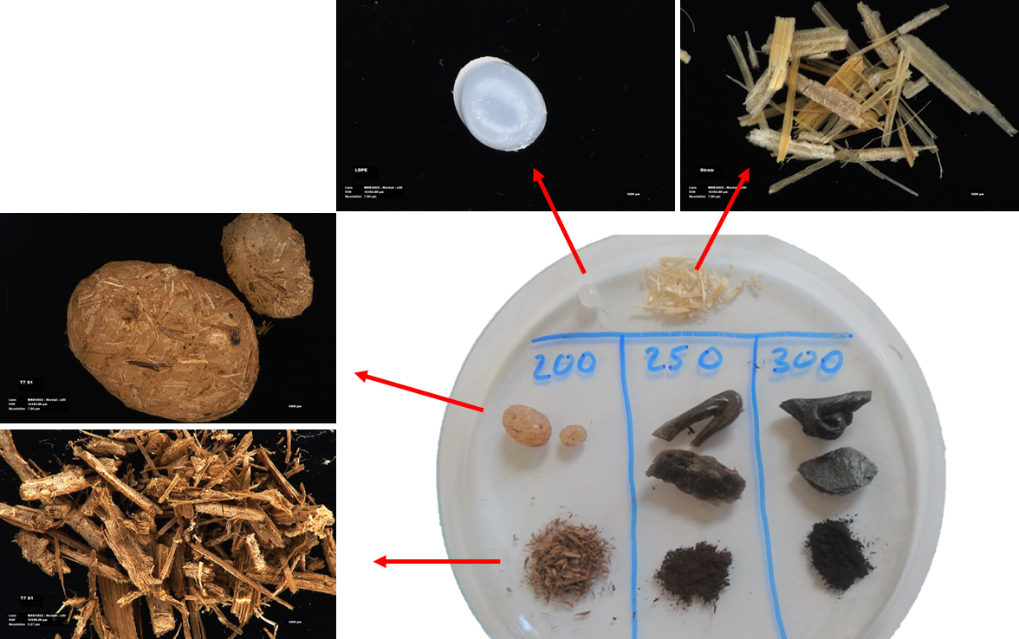


**Fig. S1** Solid Product images after HTP at 200°C. Products were similar to the original feedstock

Soil incubation experiments were conducted to assess the impact of hydrothermal co-processing (HTP) liquid-phase effluent on the soil microbiome (Fig. S2). Two soils were incubated at 25°C under aerobic conditions for two weeks — ‘Hamra’ (sandy-loam soil common in the coastal region of Israel) and ‘Grumusol’ (alluvial clay soil common in the valleys of Israel). Soils were irrigated with liquid products from HTP at 250°C and 300°C, with sterile distilled water as a control. To maintain field-capacity water content, solutions were added every three days. After incubation, samples were collected for DNA extraction.


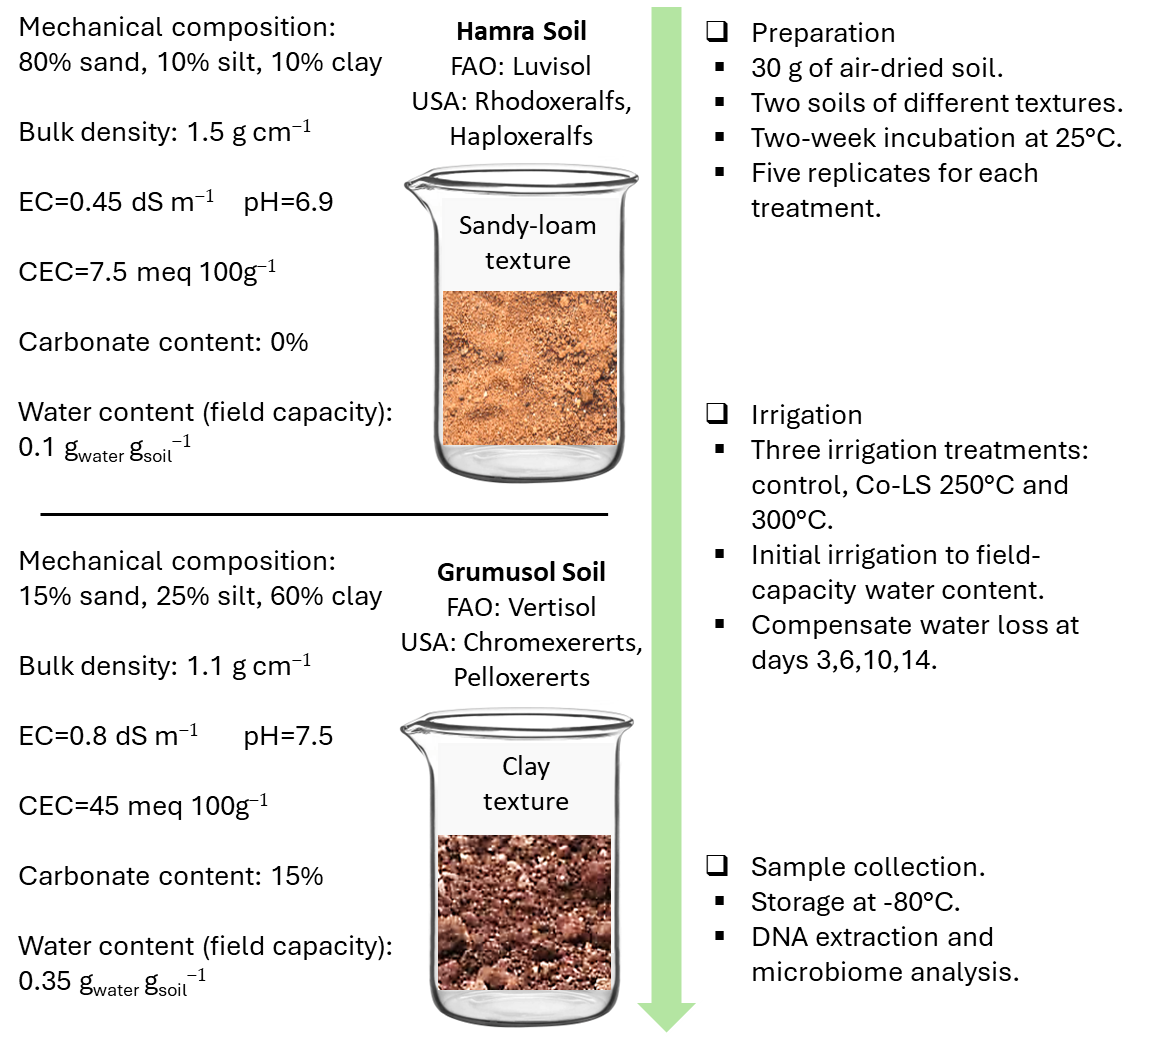


**Fig. S2** Soil incubation experiment to evaluate the effect of irrigation with HTP effluent on the soil microbiome


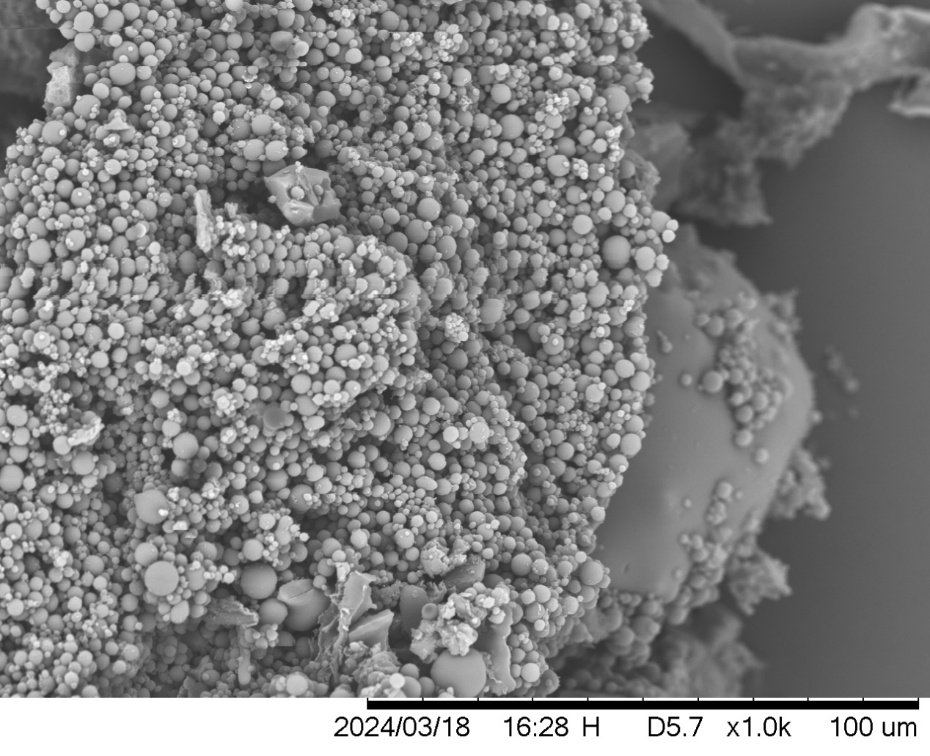


**Fig. S3** The hydrochar produced at 300°C was extensively covered with microspheres, indicating a higher degree of degradation and structural alteration

**Table S1.** Summary of solid product mass and recovery from Individual and Co-HTP of LDPE and straw. Polymeric solid yield is calculated relative to the LDPE input; hydrochar yield is calculated relative to the straw input. All values are expressed as a mean ± standard deviation (n = 4).

|  | | **Feedstock [g]** | | **Solid product recovery [g]** | | **Yield [%]** | |
| --- | --- | --- | --- | --- | --- | --- | --- |
| **Treatment** | **Temp. [°C]** | **LDPE** | **Straw** | **Polymeric-solid** | **Hydrochar** | **Polymeric-solid** | **Hydrochar** |
| **pLDPE** | 250 | 8.0±0.0 | --- | 7.5±0.1 | --- | 93.9±0.8% | --- |
| **pLDPE** | 300 | 9.0±1.0 | --- | 8.3±1.2 | --- | 92.2±5.4% | --- |
| **pSTR** | 250 | --- | 2.0±0.0 | --- | 0.4±0.0 | --- | 17.6±0.2% |
| **pSTR** | 300 | --- | 2.0±0.0 | --- | 0.3±0.0 | --- | 13.5±0.3% |
| **Co-LS** | 250 | 8.0±0.0 | 2.0±0.0 | 8.4±0.2 | 0.3±0.0 | 104.5±2.7% | 15.4±1.5% |
| **Co-LS** | 300 | 8.0±0.0 | 2.0±0.0 | 8.1±0.2 | 0.1±0.0 | 101.0±2.8% | 4.0±1.5% |

**Table S2.** Elemental composition of LDPE and straw feedstocks, and of solid products recovered from their co-processing. All values are expressed as a mean percentage (w/w) ± standard deviation (n = 3).

|  | **C** | **H** | **N** | **O** | **ash** |
| --- | --- | --- | --- | --- | --- |
| **LDPE feed** | 85.9±0.2 | 13.3±0.2 | ND | ND | 0.8±0.4 |
| **straw feed** | 38.8±1.8 | 5.2±0.2 | 0.6±0.1 | 49.0±2.0 | 6.4±0.4 |
| **Polymeric-solid 250°C** | 83.7±0.1 | 14.5±0.8 | ND | ND | 1.8±0.8 |
| **Polymeric-solid 300°C** | 84.4±0.4 | 14.5±0.0 | ND | ND | 1.1±0.1 |
| **Hydrochar 250°C** | 58.5±0.2 | 5.9±0.2 | 0.2±0.1 | 21.4±0.1 | 14.1±1.1 |
| **Hydrochar 300°C** | 69.2±0.2 | 5.3±0.1 | 0.9±0.1 | 8.8±0.3 | 15.8±1.1 |

ND, non-detectable


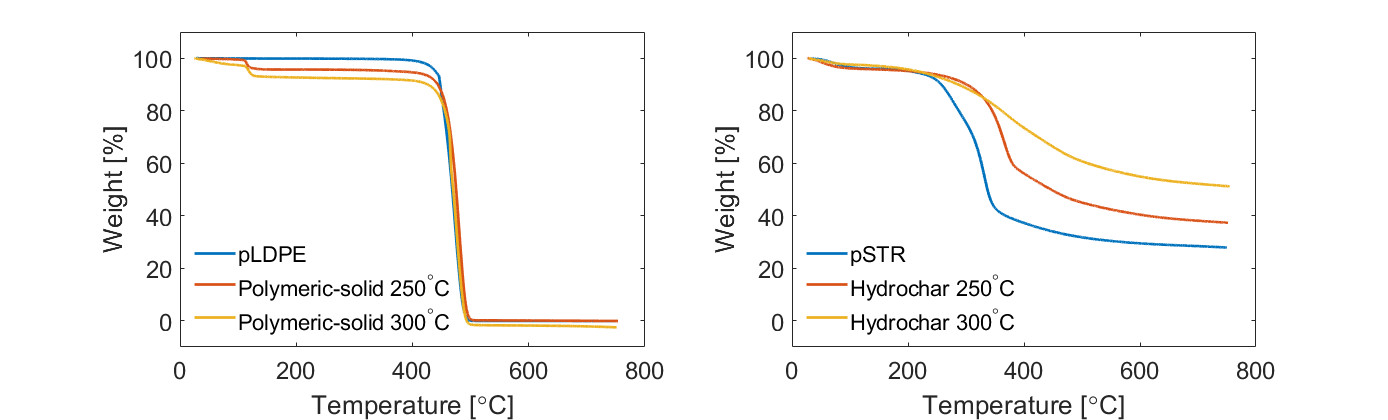


**Fig. S4** TGA curve of the polymeric-solid product after HTP (250 and 300°C), compared to the corresponding LDPE feedstock

**Fig. S5** GC-MS chromatogram of the non-polar liquid phase after hydrothermal co-processing of LDPE and straw

**Table S3.** Evaluation of minimal inhibitory concentration (MIC) of liquid effluent, created by different hydrothermal conditions, on model bacteria. U/I = Un-inhibitory.

|  | ***Staphylococcus albus*** | ***Escherichia coli*** | ***Entrococcus aerogenes*** | ***Bacillus cereus*** | ***Bacillus subtilis*** | ***Serratia marcescens*** |
| --- | --- | --- | --- | --- | --- | --- |
| **pLDPE 250°C 60’** | U/I | U/I | U/I | U/I | U/I | U/I |
| **pLDPE 300°C 30’** | U/I | U/I | U/I | U/I | U/I | U/I |
| **pLDPE 300°C 60’** | U/I | U/I | U/I | U/I | U/I | U/I |
| **pSTR 250°C 60’** | 1:1 | 1:2 | 1:1 | 1:2 | 1:4 | 1:2 |
| **pSTR 300°C 60’** | 1:4 | 1:4 | 1:2 | 1:4 | 1:8 | 1:2 |
| **Co-LS 250°C 60’** | 1:2 | 1:2 | 1:1 | 1:1 | 1:8 | 1:1 |
| **Co-LS 300°C 60’** | 1:8 | 1:2 | 1:1 | 1:2 | 1:8 | 1:2 |


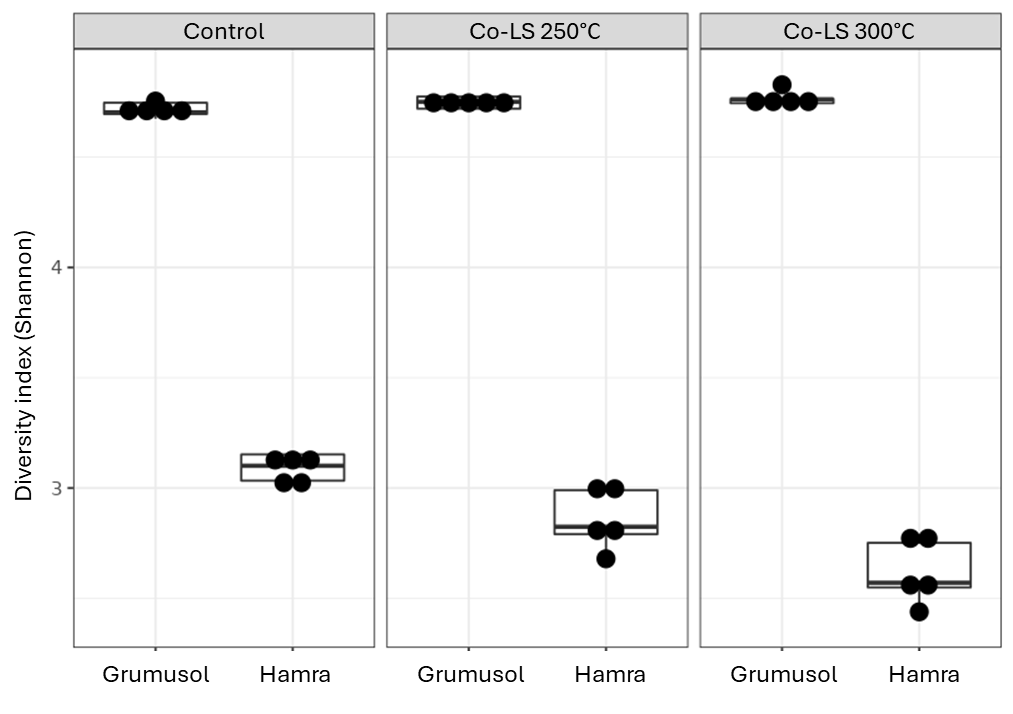


**Fig. S6** Alpha-diversity parameters (Shannon’s index) from the two incubated soils (Grumusol and Hamra) irrigated with water (control) and the effluent after hydrothermal co-processing of straw and LDPE (60 min) at 250°C and 300°C


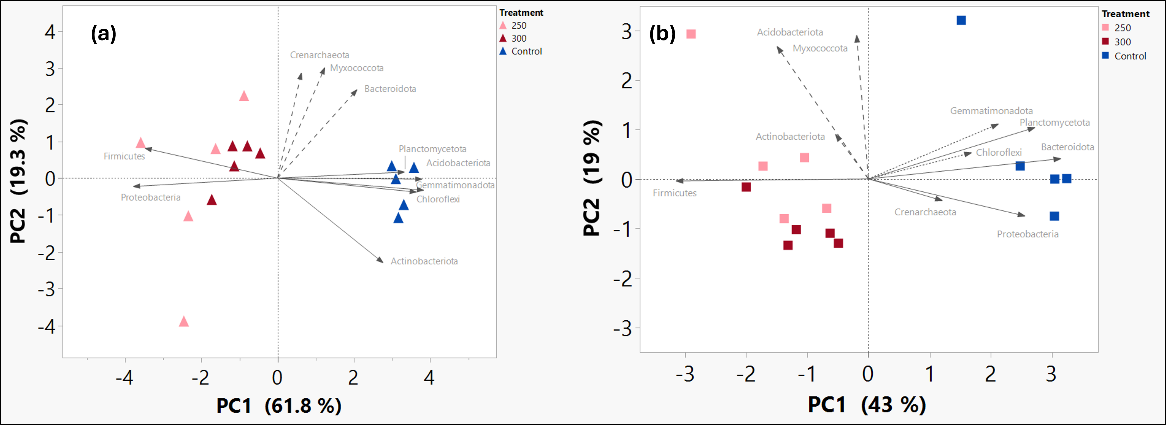


**Fig. S7** Principal Component Analysis (PCA) biplots of soil bacterial community structure at the phylum-level for ‘Grumusol’ (a) and ‘Hamra’ (b) soils. The biplots illustrate the structural shifts in the microbiome following irrigation with HTP liquid products generated at 250°C (light red) and 300°C (dark red) compared to the control (blue)

**Table S4.** Species-level microbial clusters identified in Grumosol soil samples based on hierarchical clustering of amplicon sequence variants. For each cluster, the number of species included, the most representative species, and the proportion of variance explained by the cluster are reported. Taxonomic classification is presented from domain to species level when available. The proportion of variance explained reflects the internal coherence of each cluster and indicates the similarity in abundance patterns of species grouped within each cluster across the Grumosol samples.

| **Cluster** | **Number of species** | **Most representative specie** | **Cluster proportion of variation explained** |
| --- | --- | --- | --- |
| 1 | 12 | Bacteria;Firmicutes;Bacilli;Bacillales;Planococcaceae;Solibacillus;Other | 0.823 |
| 2 | 23 | Bacteria;Bacteroidota;Bacteroidia;Cytophagales;Spirosomaceae;Dyadobacter;psychrophilus | 0.918 |
| 3 | 17 | Bacteria;Actinobacteriota;Actinobacteria;Micromonosporales;Micromonosporaceae;Catellatospora;tagetis | 0.852 |
| 4 | 18 | Bacteria;Proteobacteria;Gammaproteobacteria;Burkholderiales;Oxalobacteraceae;Janthinobacterium;Other | 0.832 |
| 5 | 14 | Bacteria;Actinobacteriota;Actinobacteria;Micrococcales;Other;Other;Other | 0.882 |
| 6 | 16 | Bacteria;Proteobacteria;Gammaproteobacteria;Pseudomonadales;Other;Other;Other | 0.828 |
| 7 | 12 | Bacteria;MBNT15;Other;Other;Other;Other;Other | 0.975 |
| 8 | 11 | Bacteria;Cyanobacteria;Cyanobacteriia;Cyanobacteriales;Chroococcidiopsaceae;Other;Other | 0.956 |
| 9 | 13 | Bacteria;Bacteroidota;Bacteroidia;Cytophagales;Hymenobacteraceae;Pontibacter;deserti | 0.854 |
| 10 | 8 | Bacteria;Planctomycetota;Planctomycetes;Pirellulales;Pirellulaceae;Bythopirellula;Other | 0.877 |
| 11 | 15 | Bacteria;Acidobacteriota;Blastocatellia;Blastocatellales;Blastocatellaceae;OLB17;Other | 0.841 |
| 12 | 14 | Bacteria;Proteobacteria;Gammaproteobacteria;Pseudomonadales;Pseudomonadaceae;Pseudomonas;putida | 0.821 |
| 13 | 13 | Bacteria;Actinobacteriota;Actinobacteria;Propionibacteriales;Nocardioidaceae;Aeromicrobium;flavum | 0.95 |
| 14 | 10 | Bacteria;Proteobacteria;Gammaproteobacteria;Xanthomonadales;Xanthomonadaceae;Xanthomonas;Other | 0.876 |
| 15 | 13 | Bacteria;Actinobacteriota;Actinobacteria;Corynebacteriales;Nocardiaceae;Other;Other | 0.884 |
| 16 | 15 | Bacteria;Actinobacteriota;Actinobacteria;Streptomycetales;Streptomycetaceae;Streptomyces;haliclonae | 0.775 |
| 17 | 14 | Bacteria;Actinobacteriota;Actinobacteria;Micrococcales;Microbacteriaceae;Subtercola;boreus | 0.79 |
| 18 | 10 | Bacteria;Actinobacteriota;Actinobacteria;Micrococcales;Intrasporangiaceae;Other;Other | 0.727 |
| 19 | 7 | Bacteria;Proteobacteria;Gammaproteobacteria;Burkholderiales;Comamonadaceae;Piscinibacter;Other | 0.585 |
| 20 | 6 | Bacteria;Bacteroidota;Bacteroidia;Cytophagales;Cytophagaceae;Rhodocytophaga;Other | 0.711 |
| 21 | 7 | Bacteria;Firmicutes;Bacilli;Bacillales;Other;Other;Other | 0.676 |
| 22 | 7 | Bacteria;Actinobacteriota;Actinobacteria;Micromonosporales;Micromonosporaceae;Actinoplanes;Other | 0.638 |
| 23 | 8 | Bacteria;Proteobacteria;Gammaproteobacteria;Burkholderiales;Comamonadaceae;Other;Other | 0.641 |
| 24 | 5 | Bacteria;Deinococcota;Deinococci;Deinococcales;Trueperaceae;Truepera;Other | 0.781 |
| 25 | 6 | Bacteria;Proteobacteria;Gammaproteobacteria;Burkholderiales;Oxalobacteraceae;Other;Other | 0.784 |
| 26 | 8 | Bacteria;Bacteroidota;Bacteroidia;Sphingobacteriales;AKYH767;Other;Other | 0.643 |
| 27 | 7 | Bacteria;Gemmatimonadota;Gemmatimonadetes;Gemmatimonadales;Gemmatimonadaceae;Gemmatimonas;Other | 0.636 |
| 28 | 8 | Bacteria;Bacteroidota;Bacteroidia;Sphingobacteriales;Sphingobacteriaceae;Pedobacter;Other | 0.579 |
| 29 | 5 | Archaea;Crenarchaeota;Nitrososphaeria;Nitrososphaerales;Nitrososphaeraceae;Candidatus Nitrososphaera;Other | 0.791 |
| 30 | 4 | Bacteria;Proteobacteria;Alphaproteobacteria;Sphingomonadales;Sphingomonadaceae;Qipengyuania;Other | 0.668 |
| 31 | 7 | Bacteria;Actinobacteriota;Actinobacteria;Micromonosporales;Micromonosporaceae;Allocatelliglobosispora;scoriae | 0.72 |
| 32 | 7 | Bacteria;Firmicutes;Bacilli;Thermoactinomycetales;Thermoactinomycetaceae;Shimazuella;kribbensis | 0.713 |
| 33 | 6 | Bacteria;Actinobacteriota;Actinobacteria;Frankiales;Nakamurellaceae;Nakamurella;Other | 0.657 |
| 34 | 5 | Bacteria;Bacteroidota;Bacteroidia;Cytophagales;Hymenobacteraceae;Adhaeribacter;aerophilus | 0.714 |
| 35 | 8 | Bacteria;Actinobacteriota;Actinobacteria;Pseudonocardiales;Pseudonocardiaceae;Pseudonocardia;Other | 0.679 |
| 36 | 29 | Bacteria;Chloroflexi;Gitt-GS-136;Other;Other;Other;Other | 0.857 |
| 37 | 6 | Bacteria;Actinobacteriota;Actinobacteria;Micromonosporales;Micromonosporaceae;Couchioplanes;Other | 0.717 |
| 38 | 6 | Bacteria;Planctomycetota;Phycisphaerae;CCM11a;Other;Other;Other | 0.673 |
| 39 | 8 | Bacteria;Actinobacteriota;Acidimicrobiia;Microtrichales;Microtrichaceae;Other;Other | 0.607 |
| 40 | 7 | Bacteria;Myxococcota;Myxococcia;Myxococcales;Myxococcaceae;Other;Other | 0.755 |
| 41 | 5 | Bacteria;Bacteroidota;Bacteroidia;Chitinophagales;Chitinophagaceae;Niastella;yeongjuensis | 0.6 |
| 42 | 5 | Bacteria;Chloroflexi;Anaerolineae;Ardenticatenales;Ardenticatenaceae;Other;Other | 0.631 |
| 43 | 7 | Bacteria;Proteobacteria;Alphaproteobacteria;Sphingomonadales;Sphingomonadaceae;Sphingomonas;Other | 0.724 |
| 44 | 7 | Bacteria;Verrucomicrobiota;Verrucomicrobiae;Pedosphaerales;Pedosphaeraceae;Ellin517;Other | 0.721 |
| 45 | 5 | Bacteria;Actinobacteriota;Actinobacteria;Pseudonocardiales;Pseudonocardiaceae;Actinophytocola;Other | 0.758 |
| 46 | 4 | Bacteria;NB1-j;Other;Other;Other;Other;Other | 0.689 |
| 47 | 6 | Bacteria;Deinococcota;Deinococci;Deinococcales;Deinococcaceae;Deinococcus;Other | 0.585 |
| 48 | 2 | Bacteria;Proteobacteria;Alphaproteobacteria;Rhizobiales;Rhizobiaceae;Allorhizobium-Neorhizobium-Pararhizobium-Rhizobium;Other | 0.746 |
| 49 | 5 | Bacteria;Gemmatimonadota;AKAU4049;Other;Other;Other;Other | 0.655 |
| 50 | 8 | Bacteria;Proteobacteria;Gammaproteobacteria;Burkholderiales;Comamonadaceae;Azohydromonas;Other | 0.646 |
| 51 | 4 | Bacteria;Actinobacteriota;Actinobacteria;Propionibacteriales;Nocardioidaceae;Marmoricola;Other | 0.713 |
| 52 | 6 | Bacteria;Planctomycetota;Planctomycetes;Pirellulales;Pirellulaceae;Pir4 lineage;Other | 0.726 |
| 53 | 3 | Bacteria;Chloroflexi;Dehalococcoidia;SAR202 clade;Other;Other;Other | 0.788 |
| 54 | 3 | Bacteria;Myxococcota;Polyangia;Polyangiales;Polyangiaceae;Aetherobacter;rufus | 0.706 |
| 55 | 5 | Bacteria;Proteobacteria;Alphaproteobacteria;Rhizobiales;Devosiaceae;Devosia;Other | 0.718 |
| 56 | 7 | Bacteria;Actinobacteriota;Actinobacteria;Frankiales;Geodermatophilaceae;Blastococcus;endophyticus | 0.79 |
| 57 | 3 | Bacteria;Proteobacteria;Alphaproteobacteria;Caulobacterales;Caulobacteraceae;PMMR1;Other | 0.749 |
| 58 | 3 | Bacteria;Bacteroidota;Bacteroidia;Cytophagales;Hymenobacteraceae;Nibribacter;Other | 0.885 |
| 59 | 7 | Bacteria;Proteobacteria;Gammaproteobacteria;Burkholderiales;Nitrosomonadaceae;IS-44;Other | 0.656 |
| 60 | 6 | Bacteria;Bacteroidota;Bacteroidia;Chitinophagales;Saprospiraceae;Other;Other | 0.677 |
| 61 | 7 | Bacteria;Gemmatimonadota;Longimicrobia;Longimicrobiales;Longimicrobiaceae;YC-ZSS-LKJ147;Other | 0.655 |
| 62 | 3 | Bacteria;Actinobacteriota;Acidimicrobiia;Other;Other;Other;Other | 0.76 |
| 63 | 5 | Bacteria;Firmicutes;Bacilli;Paenibacillales;Paenibacillaceae;Ammoniibacillus;agariperforans | 0.601 |
| 64 | 6 | Bacteria;Firmicutes;Bacilli;Erysipelotrichales;Erysipelotrichaceae;Turicibacter;sanguinis | 0.717 |
| 65 | 7 | Bacteria;Proteobacteria;Alphaproteobacteria;Rhizobiales;D05-2;Other;Other | 0.711 |
| 66 | 8 | Bacteria;Actinobacteriota;Actinobacteria;0319-7L14;Other;Other;Other | 0.799 |
| 67 | 3 | Bacteria;Proteobacteria;Alphaproteobacteria;Sphingomonadales;Sphingomonadaceae;Novosphingobium;ginsenosidimutans | 0.821 |
| 68 | 5 | Bacteria;Planctomycetota;Planctomycetes;Planctomycetales;Other;Other;Other | 0.71 |
| 69 | 8 | Bacteria;Proteobacteria;Gammaproteobacteria;Burkholderiales;Oxalobacteraceae;Massilia;Other | 0.806 |
| 70 | 4 | Bacteria;Proteobacteria;Alphaproteobacteria;Rhizobiales;Rhizobiaceae;Shinella;Other | 0.792 |
| 71 | 4 | Bacteria;Proteobacteria;Alphaproteobacteria;Azospirillales;Other;Other;Other | 0.704 |
| 72 | 4 | Bacteria;Firmicutes;Bacilli;Paenibacillales;Paenibacillaceae;Paenibacillus;thermoaerophilus | 0.854 |
| 73 | 4 | Bacteria;Proteobacteria;Alphaproteobacteria;Rhodobacterales;Rhodobacteraceae;Oceanicella;Other | 0.715 |
| 74 | 3 | Bacteria;Nitrospirota;Nitrospiria;Nitrospirales;Nitrospiraceae;Nitrospira;Other | 0.737 |
| 75 | 2 | Bacteria;Firmicutes;Bacilli;Alicyclobacillales;Alicyclobacillaceae;Tumebacillus;Other | 0.832 |
| 76 | 6 | Bacteria;Gemmatimonadota;Other;Other;Other;Other;Other | 0.667 |
| 77 | 3 | Bacteria;Bacteroidota;Bacteroidia;Chitinophagales;Chitinophagaceae;Flavisolibacter;Other | 0.766 |
| 78 | 6 | Bacteria;Actinobacteriota;Actinobacteria;Micromonosporales;Micromonosporaceae;Asanoa;Other | 0.645 |
| 79 | 5 | Bacteria;Proteobacteria;Alphaproteobacteria;Azospirillales;Azospirillaceae;Skermanella;stibiiresistens | 0.721 |
| 80 | 2 | Bacteria;Elusimicrobiota;Lineage IIb;Other;Other;Other;Other | 0.771 |
| 81 | 5 | Bacteria;Proteobacteria;Gammaproteobacteria;Pseudomonadales;Pseudomonadaceae;Pseudomonas;Other | 0.746 |
| 82 | 3 | Bacteria;Actinobacteriota;Actinobacteria;Streptosporangiales;Streptosporangiaceae;Nonomuraea;Other | 0.826 |
| 83 | 3 | Bacteria;Proteobacteria;Gammaproteobacteria;Pseudomonadales;Moraxellaceae;Acinetobacter;Other | 0.834 |
| 84 | 4 | Bacteria;Proteobacteria;Alphaproteobacteria;Acetobacterales;Acetobacteraceae;Acidicaldus;Other | 0.774 |
| 85 | 3 | Bacteria;Proteobacteria;Alphaproteobacteria;Tistrellales;Geminicoccaceae;Other;Other | 0.719 |
| 86 | 2 | Bacteria;Acidobacteriota;Acidobacteriae;Solibacterales;Solibacteraceae;Candidatus Solibacter;Other | 0.829 |

**Table S5.** Species-level microbial clusters identified in Hamra soil samples based on hierarchical clustering of amplicon sequence variants. For each cluster, the number of species included, the most representative species, and the proportion of variance explained by the cluster are reported. Taxonomic classification is presented from domain to species level when available. The proportion of variance explained reflects the internal coherence of each cluster and indicates the similarity in abundance patterns of species grouped within each cluster across the Grumosol samples.

| **Cluster** | **Number of species** | **Most representative specie** | **Cluster proportion of variation explained** |
| --- | --- | --- | --- |
| 1 | 28 | Bacteria;Firmicutes;Bacilli;Bacillales;Planococcaceae;Domibacillus;tundrae | 0.871 |
| 2 | 12 | Bacteria;Proteobacteria;Alphaproteobacteria;Azospirillales;Azospirillaceae;Skermanella;Other | 0.899 |
| 3 | 23 | Bacteria;Acidobacteriota;Blastocatellia;Pyrinomonadales;Pyrinomonadaceae;RB41;Other | 0.848 |
| 4 | 18 | Bacteria;Acidobacteriota;Blastocatellia;11-24;Other;Other;Other | 0.877 |
| 5 | 19 | Bacteria;Methylomirabilota;Methylomirabilia;Rokubacteriales;Other;Other;Other | 0.843 |
| 6 | 15 | Bacteria;Actinobacteriota;Acidimicrobiia;Microtrichales;Iamiaceae;Iamia;Other | 0.856 |
| 7 | 11 | Bacteria;Bacteroidota;Bacteroidia;Cytophagales;Hymenobacteraceae;Pontibacter;populi | 0.844 |
| 8 | 11 | Bacteria;Proteobacteria;Alphaproteobacteria;Caulobacterales;Hyphomonadaceae;SWB02;Other | 0.846 |
| 9 | 11 | Bacteria;Firmicutes;Bacilli;Paenibacillales;Paenibacillaceae;Ammoniibacillus;Other | 0.781 |
| 10 | 11 | Bacteria;Bacteroidota;Bacteroidia;Cytophagales;Cyclobacteriaceae;Other;Other | 0.908 |
| 11 | 8 | Bacteria;Firmicutes;Bacilli;Alicyclobacillales;Alicyclobacillaceae;Tumebacillus;Other | 0.835 |
| 12 | 9 | Bacteria;Proteobacteria;Gammaproteobacteria;Xanthomonadales;Xanthomonadaceae;Thermomonas;Other | 0.95 |
| 13 | 9 | Bacteria;Proteobacteria;Alphaproteobacteria;Sphingomonadales;Sphingomonadaceae;Erythrobacter;Other | 0.899 |
| 14 | 9 | Bacteria;Firmicutes;Bacilli;Bacillales;Bacillaceae;Falsibacillus;Other | 0.773 |
| 15 | 9 | Bacteria;Firmicutes;Clostridia;Clostridiales;Clostridiaceae;Clostridium sensu stricto 10;Other | 0.776 |
| 16 | 5 | Bacteria;Firmicutes;Bacilli;Thermoactinomycetales;Thermoactinomycetaceae;Thermoflavimicrobium;Other | 0.876 |
| 17 | 8 | Bacteria;Proteobacteria;Gammaproteobacteria;Pseudomonadales;Alcanivoracaceae1;Alcanivorax;Other | 0.674 |
| 18 | 8 | Bacteria;Actinobacteriota;Actinobacteria;Frankiales;Geodermatophilaceae;Blastococcus;Other | 0.68 |
| 19 | 19 | Bacteria;Actinobacteriota;Actinobacteria;Propionibacteriales;Nocardioidaceae;Nocardioides;hankookensis | 0.843 |
| 20 | 8 | Bacteria;Sumerlaeota;Sumerlaeia;Sumerlaeales;Sumerlaeaceae;Sumerlaea;Other | 0.807 |
| 21 | 7 | Bacteria;Proteobacteria;Alphaproteobacteria;Acetobacterales;Acetobacteraceae;Roseomonas;Other | 0.615 |
| 22 | 3 | Bacteria;Proteobacteria;Alphaproteobacteria;Puniceispirillales;Puniceispirillales Incertae Sedis;Constrictibacter;Other | 0.716 |
| 23 | 4 | Bacteria;Proteobacteria;Alphaproteobacteria;Rhizobiales;Rhizobiaceae;Other;Other | 0.819 |
| 24 | 6 | Bacteria;Firmicutes;Bacilli;Bacillales;Planococcaceae;Planococcus;Other | 0.713 |
| 25 | 6 | Bacteria;Bacteroidota;Bacteroidia;Sphingobacteriales;Sphingobacteriaceae;Arcticibacter;Other | 0.696 |
| 26 | 4 | Bacteria;Proteobacteria;Alphaproteobacteria;Tistrellales;Geminicoccaceae;Other;Other | 0.769 |
| 27 | 3 | Bacteria;Actinobacteriota;Thermoleophilia;Gaiellales;Gaiellaceae;Gaiella;Other | 0.782 |
| 28 | 3 | Bacteria;Firmicutes;Clostridia;Clostridiales;Clostridiaceae;Clostridium sensu stricto 1;Other | 0.76 |
| 29 | 6 | Bacteria;Bacteroidota;Bacteroidia;Cytophagales;Cyclobacteriaceae;Fulvivirga;Other | 0.762 |
| 30 | 2 | Bacteria;Proteobacteria;Alphaproteobacteria;Caulobacterales;Caulobacteraceae;Other;Other | 0.795 |


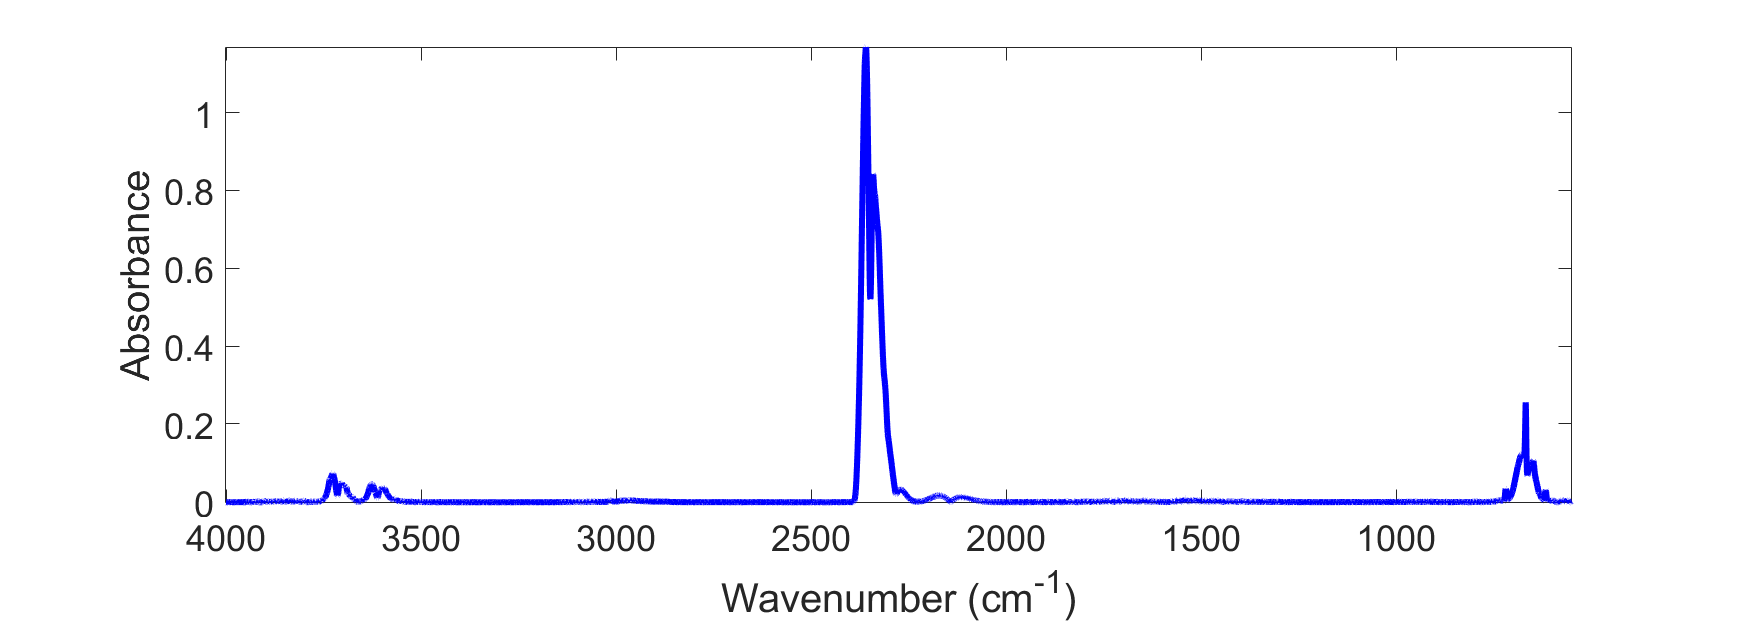


**Fig. S8** Absorbance spectrum of the emitted gas from LDPE reference treatment at 300°C. No significant absorbance related to organic compounds was observed, supporting that the alkene-related gases detected in the co-treatment of LDPE with straw likely originate from the straw component

Phenolic compounds with methoxy (R−O−CH3) or di-methoxy functional groups were identified in the non-polar liquid after 300°C treatment (Fig. S9), and matches straw decomposition and scission (red dotted line). The remaining part, 2-propenol, might go hydrodeoxygenation to propene.

**
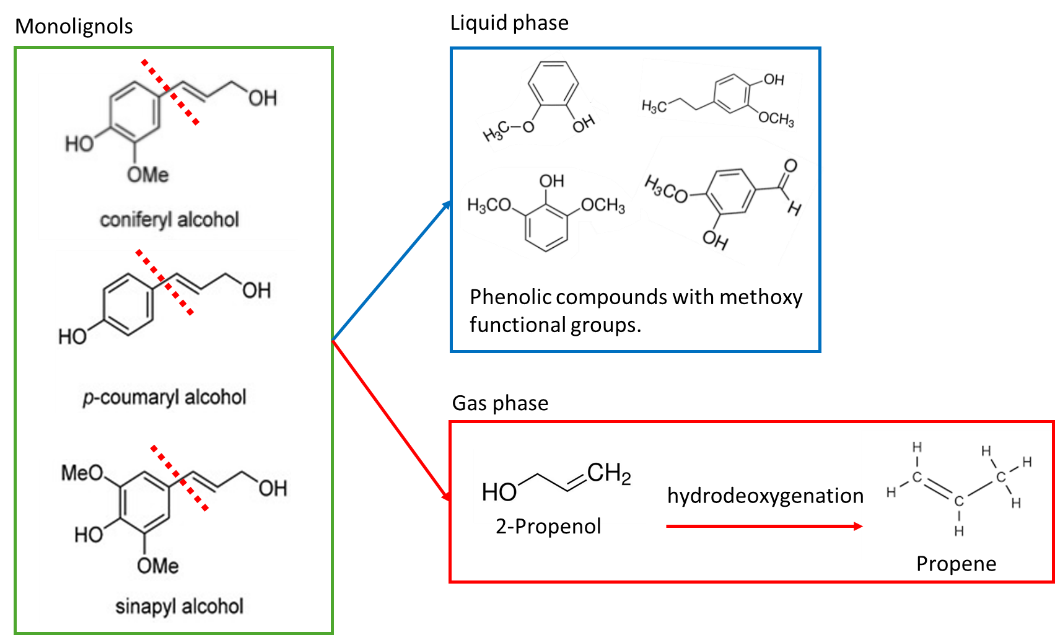
**

**Fig. S9** Monolignol scission (red dotted line) and the identified products in the non-polar liquid phase and gas phase

Table S6–7 summarizes the integrated absorbance values of the standard propene spectrum (from the PNNL database) and the corresponding integration values obtained from the FTIR signals of gases emitted during the co-processing of LDPE and straw. Theoretical calculations of gas concentration and total emission load were based on the standard spectrum for 1 ppm propene at a 1 m path length. Using this reference, calculations were performed for three distinct spectral integration ranges. Variations in the calculated concentrations between spectral regions are expected, due to differences in vibrational mode intensity, integration band properties, and spectral noise. To improve robustness, three regions were evaluated, and the mean value was reported. All standard absorbance values were normalized to a 5 m path length to match the experimental setup. Gas concentrations (in ppm) were determined by taking the ratio between the measured integrated absorbance and the reference values. These values were then converted to mg L⁻¹ using the molar mass of propene and the ideal gas law at standard conditions. The resulting concentrations were multiplied by the total collected gas volume (5 L) to estimate the total mass of emitted propene.

**Table S6.** Integrated absorbance values of the standard propene spectrum (from the PNNL database) and the corresponding integration values of Co-LS treatments.

| **Integration**  **spectral region (cm−1)** | **Reference signal** | **Reference signal**  **normalized to 5 m** | **Co-LS 250°C integral** | **ppm** | **Co-LS 300°C integral** | **ppm** |
| --- | --- | --- | --- | --- | --- | --- |
| **2800–3200** | 0.01716 | 0.0858 | 8.631 | 100.6 | 107.000 | 1247.1 |
| **1600–1700** | 0.001935 | 0.001935 | --- | --- | 3.012 | 311.3 |
| **800–1100** | 0.01012 | 0.0506 | 4.491 | 88.8 | 42.480 | 839.5 |

**Table S7.** Quantification of propene in the emitted gas based on FTIR absorbance, using standard reference spectra of 1 ppm at 1 m path length (PNNL): calculated concentrations across three spectral regions and corresponding mean values.

| **Integration**  **spectral region** | **Co-LS 250°C** | | | **Co-LS 300°C** | | |
| --- | --- | --- | --- | --- | --- | --- |
| **C [ppm]** | **C [mg m−3]** | **Total in 5 L [mg]** | **C [ppm]** | **C [mg m−3]** | **Total in 5 L [mg]** |
| **2800–3200 cm−1** | 100.6 | 172.8 | 0.9 | 1247.1 | 2142.1 | 10.7 |
| **1600–1700 cm−1** | N/A | N/A | N/A | 311.3 | 534.7 | 2.7 |
| **800–1100 cm−1** | 88.8 | 152.5 | 0.8 | 839.5 | 1442.0 | 7.2 |
| **Mean value (±std)** | 94.7±8.4 | 162.6±14.4 | 0.8±0.1 | 799.3±469.8 | 1373.0±805.9 | 6.9±4.0 |
